# Supplementary material for: Screening of oxalate-degrading probiotics and preventive effect of Lactiplantibacillus plantarum AR1089 on kidney stones
Source: Royal Society of Chemistry journal article supplement (doi:10.1039/d4fo03133d), 2024-01-01
Supplement: d4fo03133d1.pdf [file d4fo03133d1.pdf]

Table S1 Crystallization Scoring Criteria

| Score    | Number and size of crystals                     |
|----------|-------------------------------------------------|
| 0 points | No crystals in high magnification field of view |
| 1 points | Few crystals (1 ~ 9)                            |
| 2 points | Medium number of crystals (10 ~ 24)             |
| 3 points | More than medium number of crystals (25 ~ 49)   |
| 4 points | Large number of crystals (50 ~ 99)              |
| 5 points | Very large number of crystals (100 ~ 199)       |
| 6 points | Tightly packed crystals or very large crystals  |

Table S2 Reaction primer sequence

| Primer name | Primer Sequences (5' - 3') |
|-------------|----------------------------|
| Kim-1-F     | GGGTCTCCTTCACAGCACATT      |
| Kim-1-R     | CAAGGCCAGCCCTCTAATGG       |
| OPN-F       | TGAGACTGGCAGTGGTTTGC       |
| OPN-R       | CCACTTTCACCGGGAGACA        |
| SOD-F       | ATGGGACAATACACAAGGCTG      |
| SOD-R       | AATCCCAATCACACCACAAGC      |
| MCP-1-F     | TGGGCCTGTTGTTACAGTT        |
| MCP-1-R     | ACCTGCTGCTGGTGATTCTC       |
| GAPDH -F    | AGGCTCTTGGCTTAGTTATC       |
| GAPDH -R    | TTCTTGATTGCGGCGTTA         |

Table S3 Strains with OD<sub>600</sub>>0.2 under the condition of OX<sub>30</sub>-MRS<sub>0</sub>

| Strain number | OD <sub>600</sub> value | Name of strain                       | Source of strain                |
|---------------|-------------------------|--------------------------------------|---------------------------------|
| AR48          | 0.253                   | <i>Enterococcus faecalis</i>         | Pickled radish                  |
| AR161         | 0.225                   | <i>Lacticaseibacillus paracasei</i>  | Rice wine                       |
| AR209         | 0.217                   | <i>Enterococcus casseliflavus</i>    | Pickle                          |
| AR243         | 0.217                   | <i>Pediococcus pentosaceus</i>       | Pickle                          |
| AR302         | 0.242                   | <i>Lacticaseibacillus paracasei</i>  | Huangjiu pre-fermentation broth |
| AR343         | 0.261                   | <i>Lactobacillus harbinensis</i>     | Pickle                          |
| AR1043        | 0.250                   | <i>Lactiplantibacillus plantarum</i> | Huangjiu                        |

Table S4 Strains with OD<sub>600</sub>>1.1 under the condition of OX<sub>30</sub>-MRS<sub>10</sub>

| Strain number | OD <sub>600</sub> | Name of strain                       | Source of strain                 |
|---------------|-------------------|--------------------------------------|----------------------------------|
| AR93          | 1.065             | <i>Lacticaseibacillus paracasei</i>  | Pickle                           |
| AR171         | 1.101             | <i>Lactiplantibacillus plantarum</i> | Rice syrup water for Huangjiu    |
| AR237         | 1.124             | <i>Lactiplantibacillus plantarum</i> | Huangjiu post-fermentation broth |
| AR269         | 1.125             | <i>Lactiplantibacillus plantarum</i> | Huangjiu pre-fermentation broth  |
| AR342         | 1.124             | <i>Lactiplantibacillus plantarum</i> | Dairy products                   |
| AR496         | 1.146             | <i>Lacticaseibacillus rhamnosus</i>  | Pickle                           |
| AR501         | 1.147             | <i>Lactiplantibacillus plantarum</i> | Huangjiu                         |
| AR509         | 1.108             | <i>Lactiplantibacillus plantarum</i> | Huangjiu                         |
| AR510         | 1.100             | <i>Lactiplantibacillus plantarum</i> | Pickle                           |
| AR1043        | 1.103             | <i>Lactiplantibacillus plantarum</i> | Huangjiu                         |

Table S5 Meanwhile in OX<sub>30</sub>-MRS<sub>0</sub> and OX<sub>30</sub>-MRS<sub>10</sub> the better-growing strains

| Strain number | OD <sub>600</sub> | Name of strain                       | Source of strain                 |
|---------------|-------------------|--------------------------------------|----------------------------------|
| AR195         | 1.065             | <i>Lactiplantibacillus plantarum</i> | Pickle                           |
| AR326         | 1.101             | <i>Lactiplantibacillus plantarum</i> | Rice syrup water for Huangjiu    |
| AR495         | 1.124             | <i>Lactiplantibacillus plantarum</i> | Huangjiu post-fermentation broth |
| AR623         | 1.125             | <i>Lactiplantibacillus plantarum</i> | Huangjiu pre-fermentation broth  |
| AR674         | 1.124             | <i>Lactiplantibacillus plantarum</i> | Dairy products                   |
| AR676         | 1.146             | <i>Lacticaseibacillus paracasei</i>  | Pickle                           |
| AR693         | 1.147             | <i>Lactiplantibacillus plantarum</i> | Huangjiu                         |
| AR1011        | 1.108             | <i>Lactiplantibacillus plantarum</i> | Huangjiu                         |
| AR1019        | 1.100             | <i>Lactiplantibacillus plantarum</i> | Pickle                           |
| AR1025        | 1.098             | <i>Lactiplantibacillus plantarum</i> | Huangjiu                         |
| AR1089        | 1.103             | <i>Lactiplantibacillus plantarum</i> | Pickle                           |

Table S6 Maximum biomass and growth rate of strains under different pH conditions

| Strain number | Control                              | pH=3                                 | pH=3.5                               | pH=4                                 |                                    |
|---------------|--------------------------------------|--------------------------------------|--------------------------------------|--------------------------------------|------------------------------------|
|               | Maximum biomass (OD <sub>600</sub> ) | growth rate (OD <sub>600</sub> /h) |
| AR48          | 0.946                                | 0.088                                | 0.090                                | 0.243                                | 0.0179                             |
| AR93          | 1.919                                | 0.238                                | 0.482                                | 1.071                                | 0.0584                             |
| AR161         | 1.901                                | 0.196                                | 0.310                                | 0.586                                | 0.0432                             |
| AR171         | 2.032                                | 0.151                                | 0.327                                | 0.0654                               | 0.0456                             |
| AR195         | 1.575                                | 0.042                                | 0.126                                | 0.457                                | 0.0498                             |
| AR237         | 1.991                                | 0.151                                | 0.325                                | 0.595                                | 0.0444                             |
| AR243         | 1.608                                | 0.100                                | 0.184                                | 0.326                                | 0.0365                             |
| AR269         | 1.971                                | 0.198                                | 0.556                                | 1.170                                | 0.0573                             |
| AR302         | 1.480                                | 0.074                                | 0.126                                | 0.623                                | 0.0405                             |
| AR326         | 1.923                                | 0.208                                | 0.368                                | 0.884                                | 0.0482                             |
| AR342         | 2.052                                | 0.291                                | 0.483                                | 1.301                                | 0.0582                             |
| AR495         | 1.929                                | 0.223                                | 0.328                                | 1.133                                | 0.0618                             |
| AR496         | 1.918                                | 0.218                                | 0.342                                | 1.104                                | 0.0568                             |
| AR501         | 1.939                                | 0.178                                | 0.386                                | 1.251                                | 0.0594                             |
| AR509         | 2.058                                | 0.309                                | 0.447                                | 1.006                                | 0.0542                             |
| AR510         | 2.028                                | 0.222                                | 0.316                                | 0.806                                | 0.0492                             |
| AR623         | 1.884                                | 0.203                                | 0.220                                | 1.101                                | 0.0557                             |
| AR674         | 2.063                                | 0.237                                | 0.626                                | 1.484                                | 0.0585                             |
| AR676         | 1.817                                | 0.290                                | 0.213                                | 0.774                                | 0.0515                             |
| AR693         | 1.923                                | 0.145                                | 0.195                                | 0.554                                | 0.0399                             |
| AR1011        | 2.042                                | 0.259                                | 0.440                                | 1.436                                | 0.0650                             |
| AR1019        | 2.033                                | 0.250                                | 0.479                                | 1.288                                | 0.0596                             |
| AR1025        | 2.046                                | 0.261                                | 0.601                                | 1.423                                | 0.0599                             |
| AR1043        | 2.029                                | 0.223                                | 0.463                                | 1.365                                | 0.0646                             |
| AR1089        | 2.038                                | 0.235                                | 0.496                                | 1.481                                | 0.0588                             |

Table S7 Maximum biomass and growth rate of strains under different bile salt concentrations

| Strain number | Control                              | 0.4%                                 | 0.3%                                 | 0.2%                                 |                                    |
|---------------|--------------------------------------|--------------------------------------|--------------------------------------|--------------------------------------|------------------------------------|
|               | Maximum biomass (OD <sub>600</sub> ) | growth rate (OD <sub>600</sub> /h) |
| AR48          | 0.946                                | 0.203                                | 0.257                                | 0.571                                | 0.0868                             |
| AR93          | 1.919                                | 0.399                                | 0.426                                | 0.807                                | 0.0290                             |
| AR161         | 1.901                                | 0.389                                | 0.405                                | 0.870                                | 0.0131                             |
| AR171         | 2.032                                | 0.420                                | 0.664                                | 1.151                                | 0.0661                             |
| AR195         | 1.575                                | 1.027                                | 1.267                                | 1.491                                | 0.1053                             |
| AR237         | 1.991                                | 1.154                                | 1.372                                | 1.590                                | 0.0771                             |
| AR243         | 1.929                                | 0.429                                | 0.444                                | 0.622                                | 0.0392                             |
| AR269         | 1.971                                | 0.417                                | 0.469                                | 1.030                                | 0.0845                             |
| AR302         | 1.480                                | 0.217                                | 0.241                                | 0.745                                | 0.0604                             |
| AR326         | 1.923                                | 0.530                                | 0.547                                | 0.719                                | 0.0368                             |
| AR342         | 2.052                                | 0.829                                | 0.912                                | 1.438                                | 0.0616                             |
| AR495         | 1.608                                | 0.670                                | 0.845                                | 1.090                                | 0.0860                             |
| AR496         | 1.918                                | 0.215                                | 0.367                                | 0.633                                | 0.0359                             |
| AR501         | 1.939                                | 0.579                                | 0.921                                | 1.337                                | 0.0932                             |
| AR509         | 2.058                                | 0.735                                | 0.842                                | 1.369                                | 0.0554                             |
| AR510         | 2.028                                | 0.750                                | 1.017                                | 1.520                                | 0.0671                             |
| AR623         | 2.063                                | 0.400                                | 0.499                                | 0.950                                | 0.0669                             |
| AR674         | 1.884                                | 1.064                                | 1.252                                | 1.593                                | 0.0636                             |
| AR676         | 1.817                                | 0.404                                | 0.328                                | 0.301                                | 0.0222                             |
| AR693         | 1.923                                | 0.319                                | 0.394                                | 0.355                                | 0.0154                             |
| AR1011        | 2.042                                | 0.586                                | 0.640                                | 0.765                                | 0.0345                             |
| AR1019        | 2.033                                | 1.056                                | 1.010                                | 1.508                                | 0.0670                             |
| AR1025        | 2.046                                | 0.707                                | 1.025                                | 1.565                                | 0.0672                             |
| AR1043        | 2.029                                | 0.788                                | 1.062                                | 1.575                                | 0.0676                             |
| AR1089        | 2.038                                | 0.719                                | 0.953                                | 1.535                                | 0.0642                             |
